# Supplementary material for: Phytoplankton growth response to Asian dust addition in the northwest Pacific Ocean versus the Yellow Sea
Source: Copernicus journal article supplement (doi:10.5194/bg-15-749-2018), 2018-02-07
Supplement: Supplementary file 1 [file bg-15-749-2018-supplement.pdf]

Supplement of Biogeosciences, 15, 749–765, 2018  
<https://doi.org/10.5194/bg-15-749-2018-supplement>  
© Author(s) 2018. This work is distributed under  
the Creative Commons Attribution 3.0 License.

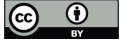

*Supplement of*

## **Phytoplankton growth response to Asian dust addition in the northwest Pacific Ocean versus the Yellow Sea**

**Chao Zhang et al.**

*Correspondence to:* Huiwang Gao ([hwgao@ouc.edu.cn](mailto:hwgao@ouc.edu.cn))

The copyright of individual parts of the supplement might differ from the CC BY 3.0 License.

## Text S1

### Simulation of Asian dust

When dust travels over the Asian continent through the atmosphere, it can experience mixing and deposition, as well as undergo chemical reactions (Formenti et al., 2011). The Asian continent suffers from air pollution to varying extents, with dynamically changing emissions of anthropogenic pollutants such as NO<sub>x</sub>, SO<sub>2</sub>, and NH<sub>3</sub> (Kim et al., 2014). The aging processes, i.e., the reactions of dust aerosols with anthropogenic pollutants, result in the Asian dust carrying a large amount of nutrients and bioavailable trace metals, prior to its deposition in the oceans. In this study, the aging process of dust followed Guieu's (2010) method and aimed at stimulating the cloud reaction between dust and synthetic evaporating cloud water. The pH around dust in the cloud process (i.e. mix with evaporating cloud water) was found to be as low as ~1 during their transport to the Yellow Sea (Meskhidze et al., 2003), whereas the typical pH in rainwater is 5 (Watanabe et al. 2001, Sasakawa and Uematsu, 2002, Wang et al. 2002, Sakihama et al. 2008, Zhang et al. 2011), meaning that a dilution by a factor of 10<sup>4</sup>. In consequent, in order to reproduce an evaporating cloud, we have used a concentration that is 10 000-fold larger in our experiments than the typical concentrations found in rainwater. Considering the typical concentrations of dust in rainwaters was 10 mg L<sup>-1</sup> (Ridame et al., 2002), the dust loading in evaporating cloud water could reach 100 g L<sup>-1</sup>. As a consequence, all of the concentrations in evaporating cloud water were around 10000-fold larger (i.e. 4 orders of magnitude larger) than those in natural rainwater. Table S1 summarized the primary chemical composition of rains in the Eastern Asian regions and the evaporating cloud water used for our simulation. As the uptake of organic acidic gases during transport is complicated for Asian dust, we did not add oxalic acid, which was used for simulating the Saharan dust by Guieu et al. (2010), to simplify the reaction of dust surface and emphasize the importance of inorganic acids (H<sub>2</sub>SO<sub>4</sub> and HNO<sub>3</sub>) (Fan et al., 2006; Formenti et al., 2011; Shi et al., 2012).

### References

- Fan, S. M., Moxim, W. J., and Levy, H.: Aeolian input of bioavailable iron to the ocean. *Geophysical research letters*, 33, 359-377, doi: 10.1029/2005GL024852, 2006.
- Formenti, P., Schütz, L., Balkanski, Y., Desboeufs, K., Ebert, M., Kandler, A. Petzold, D. Scheuven, S. Weinbruch, and Zhang, D.: Recent progress in understanding physical and chemical properties of African and Asian mineral dust. *Atmospheric Chemistry and Physics*, 11, 8231-8256, doi: 10.5194/acp-11-8231-2011, 2011.
- Guieu, C., Dulac, F., Desboeufs, K., Wagener, T., Pulido-Villena, E., Grisoni, J.-M., Louis, F., Ridame, C., Blain, S., and Brunet, C.: Large clean mesocosms and simulated dust deposition: a new methodology to investigate responses of marine oligotrophic ecosystems to atmospheric inputs, *Biogeosciences*, 7, 2765-2784, doi: 10.5194/bg-7-2765-2010, 2010.
- Kim, I.-N., Lee, K., Gruber, N., Karl, D. M., Bullister, J. L., Yang, S., and Kim, T.-W.: Increasing anthropogenic nitrogen in

- the North Pacific Ocean, *Science*, 346, 1102-1106, doi: 10.1126/science.1258396, 2014.
- Meskhidze, N., Chameides, W. L., Nenes, A., and Chen, G.: Iron mobilization in mineral dust: Can anthropogenic SO<sub>2</sub> emissions affect ocean productivity?. *Geophysical Research Letters*, 30, 267-283, doi: 10.1029/2003GL018035, 2003.
- 35 Ridame, C., & Guieu, C.: Saharan input of phosphate to the oligotrophic water of the open western Mediterranean Sea. *Limnology and Oceanography*, 47(3), 856-869, doi: 10.4319/lo.2002.47.3.0856, 2002.
- Sakihama, H., Ishiki, M., and Tokuyama, A.: Chemical characteristics of precipitation in Okinawa Island, Japan. *Atmospheric Environment*, 42, 2320-2335, doi: 10.1016/j.atmosenv.2007.12.026, 2008.
- Sasakawa, M., and Uematsu, M.: Chemical composition of aerosol, sea fog, and rainwater in the marine boundary layer of the  
40 northwestern North Pacific and its marginal seas. *Journal of Geophysical Research: Atmospheres*, 107(24): ACH 17-1–ACH 17-9, doi: 10.1029/2001JD001004, 2002.
- Shi, J., Gao, H., Zhang, J., Tan, S., Ren, J., Liu, C., Liu, Y., and Yao, X.: Examination of causative link between a spring bloom and dry/wet deposition of Asian dust in the Yellow Sea, China, *Journal of Geophysical Research: Atmospheres*, 117, D17304, doi:10.1029/2012JD017983, 2012.
- 45 Wang, Z., Akimoto, H., and Uno, I.: Neutralization of soil aerosol and its impact on the distribution of acid rain over east Asia: Observations and model results. *Journal of Geophysical Research: Atmospheres*, 107(D19): ACH 6-1–ACH 6-12, doi: 10.1029/2001JD001040, 2002.
- Watanabe, K., Ishizaka, Y., and Takenaka, C.: Chemical characteristics of cloud water over the Japan Sea and the Northwestern Pacific Ocean near the central part of Japan: airborne measurements. *Atmospheric Environment*, 35, 645-655, doi:  
50 10.1016/S1352-2310(00)00358-7, 2001.
- Zhang, J., Zhang, G. S., Bi, Y. F., and Liu, S. M.: Nitrogen species in rainwater and aerosols of the Yellow and East China seas: Effects of the East Asian monsoon and anthropogenic emissions and relevance for the NW Pacific Ocean. *Global Biogeochemical Cycles*, 25, 113-120, doi: 10.1029/2010GB003896, 2011.

55 **Table S1.** Primary chemical composition of the rains in the eastern Asian region and the simulated eastern Asian cloud water.

|                                | pH        | NO <sub>3</sub> <sup>-</sup><br>(M) | SO <sub>4</sub> <sup>2-</sup><br>(M) |
|--------------------------------|-----------|-------------------------------------|--------------------------------------|
| Reference eastern Asian rains* | 3.89–7.61 | 10 <sup>-5</sup>                    | 10 <sup>-5</sup>                     |
| Simulated cloud water          | 1**       | 10 <sup>-1</sup>                    | 10 <sup>-1</sup>                     |

\*Sasakawa and Uematsu, 2002; Watanabe et al. 2001; Zhang et al. 2011; Sakihama et al. 2008; Wang et al. 2002.

\*\* Meskhidze et al., 2003.

**Table S2.** Recovery yield, accuracy, and detection limit for trace metal analysis

| Metal | Detection limit ( $\mu\text{g L}^{-1}$ ) <sup>*</sup> | Recovery (%) | RSD (%) <sup>**</sup> |
|-------|-------------------------------------------------------|--------------|-----------------------|
| Zn    | 0.012                                                 | 90.6         | 3.17                  |
| Cu    | 0.226                                                 | 95.2         | 2.09                  |
| Cd    | 0.016                                                 | 88.5         | 0.87                  |
| Pb    | 0.019                                                 | 93.2         | 2.93                  |
| Co    | 0.017                                                 | 97.9         | 0.24                  |
| Fe    | 3.738                                                 | 95.4         | 3.88                  |
| Mn    | 0.056                                                 | 90.9         | 4.48                  |

<sup>\*</sup> Detection limit was calculated as three times the standard deviation of the blank.

<sup>\*\*</sup> RSD means 'Relative Standard Deviation'.

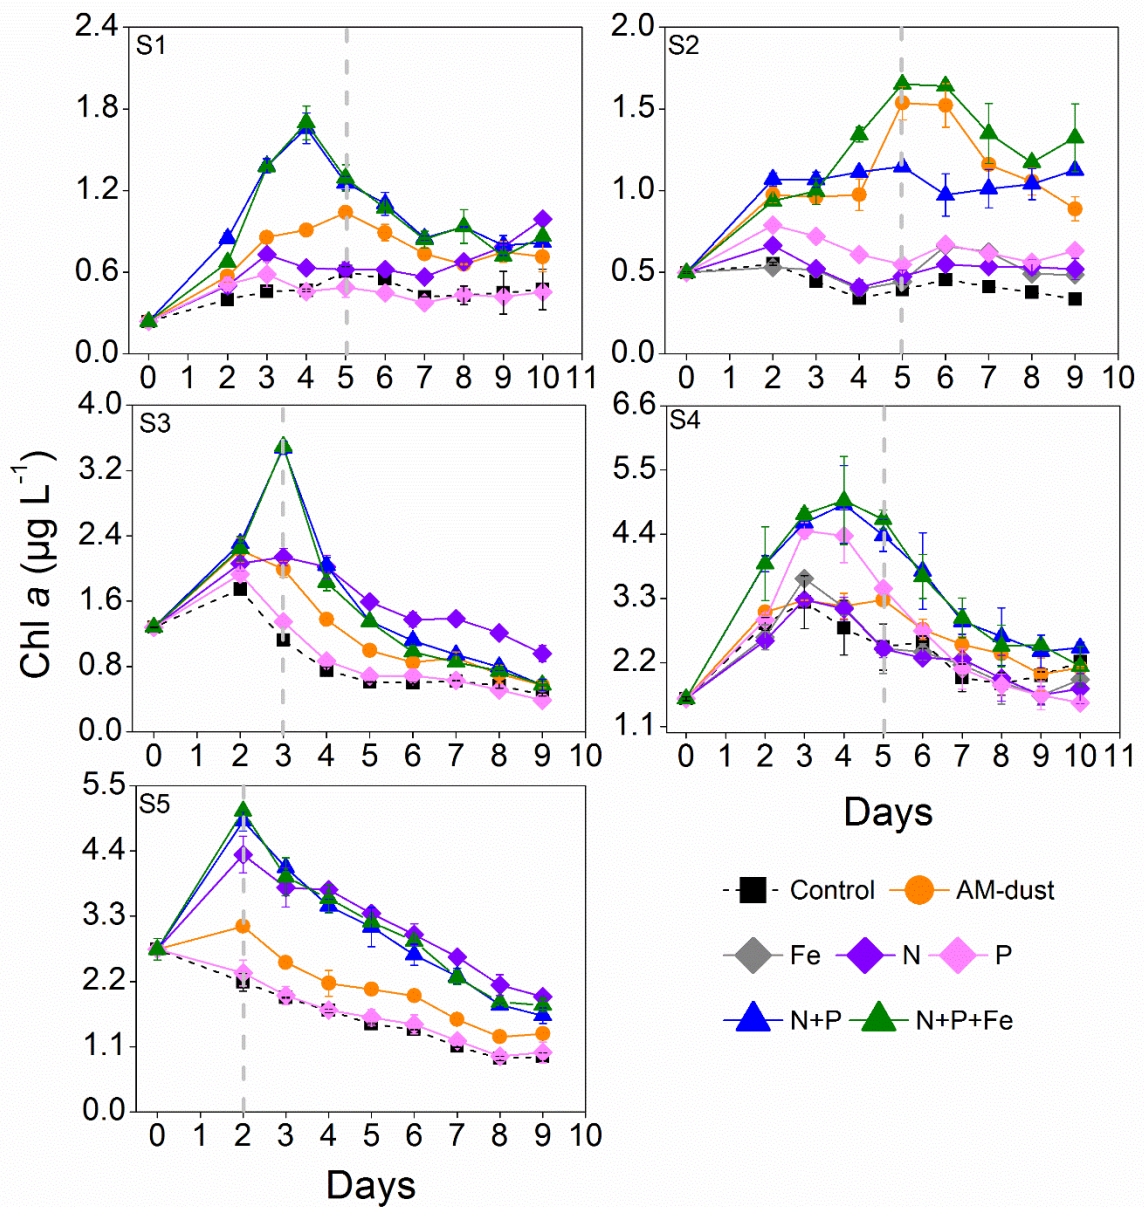

65 **Figure S1.** Changes in Chl *a* during the incubation experiments at each station. The successive increase during the incubation period in this study is identified by the dotted line.

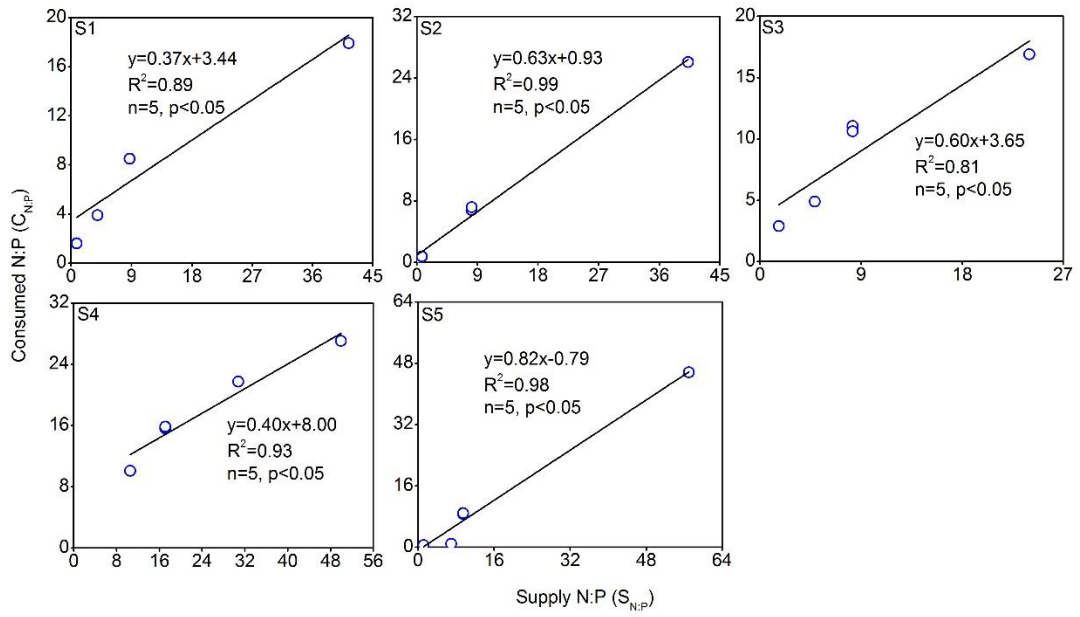

**Figure S2.** The relationship between the consumed N:P ratio ( $C_{N:P}$ ) and supply N:P ratio ( $S_{N:P}$ ) in the control and the various nutrient treatments during the successive increase in the incubation period at each station

70
